# Supplementary material
Source: Royal Society of Chemistry journal article supplement (doi:10.1039/d5tb02399h)
Supplement: d5tb02399h1.xlsx [file d5tb02399h1.xlsx]

## Sheet: Sheet1
Size classes (nm)	Volume Distribution Data (%)		Size classes (nm)	Volume Distribution Data (%)		Size classes (nm)	Volume Distribution Data (%)
0.4	0		0.4	0		0.4	0
0.463232	0		0.463232	0		0.463232	0
0.536459	0		0.536459	0		0.536459	0
0.621262	0		0.621262	0		0.621262	0
0.719471	0		0.719471	0		0.719471	0
0.833204	0		0.833204	0		0.833204	0
0.964916	0		0.964916	0		0.964916	0
1.11745	0		1.11745	0		1.11745	0
1.29409	0		1.29409	0		1.29409	0
1.49866	0		1.49866	0		1.49866	0
1.73557	0		1.73557	0		1.73557	0
2.00993	0		2.00993	0		2.00993	0
2.32766	0		2.32766	0		2.32766	0
2.69561	0		2.69561	0		2.69561	0
3.12173	0		3.12173	0		3.12173	0
3.61521	0		3.61521	0		3.61521	0
4.1867	0		4.1867	0		4.1867	0
4.84853	0		4.84853	0		4.84853	0
5.61499	0		5.61499	0		5.61499	0
6.5026	0		6.5026	0		6.5026	0
7.53052	0		7.53052	0		7.53052	0
8.72094	0		8.72094	0		8.72094	0
10.0995	0		10.0995	0		10.0995	0
11.6961	0		11.6961	0		11.6961	0
13.545	0		13.545	0		13.545	0
15.6862	0		15.6862	0		15.6862	0
18.1658	0		18.1658	0		18.1658	0
21.0374	0		21.0374	0		21.0374	0
24.363	0		24.363	0		24.363	0
28.2143	0		28.2143	0		28.2143	0
32.6744	0		32.6744	0		32.6744	0
37.8396	0		37.8396	0		37.8396	0
43.8212	0		43.8212	0		43.8212	0
50.7484	0		50.7484	0		50.7484	0
58.7707	0		58.7707	0		58.7707	0
68.0611	0		68.0611	0		68.0611	0
78.8202	0		78.8202	0.185728		78.8202	0.692538
91.28	0		91.28	2.00104		91.28	3.79591
105.709	1.96555		105.709	6.76214		105.709	9.60225
122.42	9.16177		122.42	13.1579		122.42	16.0105
141.772	20.008		141.772	18.5953		141.772	20.4265
164.183	29.1955		164.183	20.7877		164.183	20.6756
190.137	22.5706		190.137	18.5715		190.137	16.2216
220.194	13.607		220.194	12.7383		220.194	9.08526
255.002	3.45584		255.002	5.8853		255.002	3.05712
295.312	0.0357666		295.312	1.31511		295.312	0.432764
341.995	0		341.995	0		341.995	0
396.058	0		396.058	0		396.058	0
458.666	0		458.666	0		458.666	0
531.172	0		531.172	0		531.172	0
615.139	0		615.139	0		615.139	0
712.379	0		712.379	0		712.379	0
824.992	0		824.992	0		824.992	0
955.406	0		955.406	0		955.406	0
1106.44	0		1106.44	0		1106.44	0
1281.34	0		1281.34	0		1281.34	0
1483.89	0		1483.89	0		1483.89	0
1718.47	0		1718.47	0		1718.47	0
1990.12	0		1990.12	0		1990.12	0
2304.72	0		2304.72	0		2304.72	0
2669.04	0		2669.04	0		2669.04	0
3090.96	0		3090.96	0		3090.96	0
3579.58	0		3579.58	0		3579.58	0
4145.44	0		4145.44	0		4145.44	0
4800.75	0		4800.75	0		4800.75	0
5559.64	0		5559.64	0		5559.64	0
6438.51	0		6438.51	0		6438.51	0
7456.3	0		7456.3	0		7456.3	0
8634.99	0		8634.99	0		8634.99	0
