# Supplementary material
Source: Royal Society of Chemistry journal article supplement (doi:10.1039/d5tb02399h)
Supplement: d5tb02399h2.pdf [file d5tb02399h2.pdf]

1 Supplementary Materials for

2

3 **Dual-function hydrogel microspheres coordinate immune regulation and osteogenesis coupling to**  
4 **promote femoral regeneration**

5

6 Lingjun Wang *et al.*

7

8 Lingjun Wang<sup>1†</sup>, Zhengxia Ni<sup>1†</sup>, Yiyang Huang<sup>1,2†</sup>, Jiannan Mao<sup>3†</sup>, Jie Wu<sup>1</sup>, Wei  
9 Wang<sup>1</sup>, Xinzhao Jiang<sup>1</sup>, Liang Zhou<sup>1</sup>, Jincheng Tang<sup>1</sup>, Kun Xi<sup>1\*</sup>, Yong Gu<sup>1\*</sup>, Liang Chen<sup>1\*</sup>

10

11 **This file includes:**

12

13 Figures. S1 to S8

**A**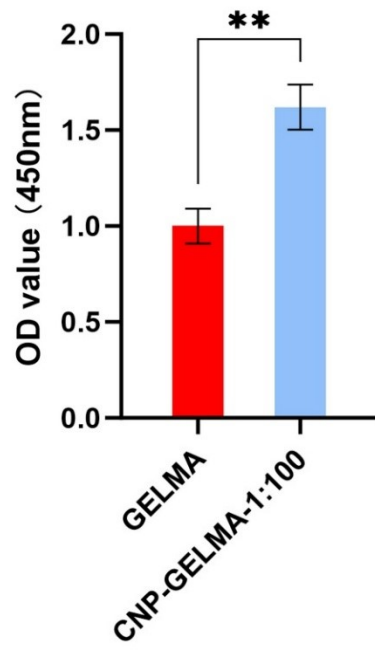

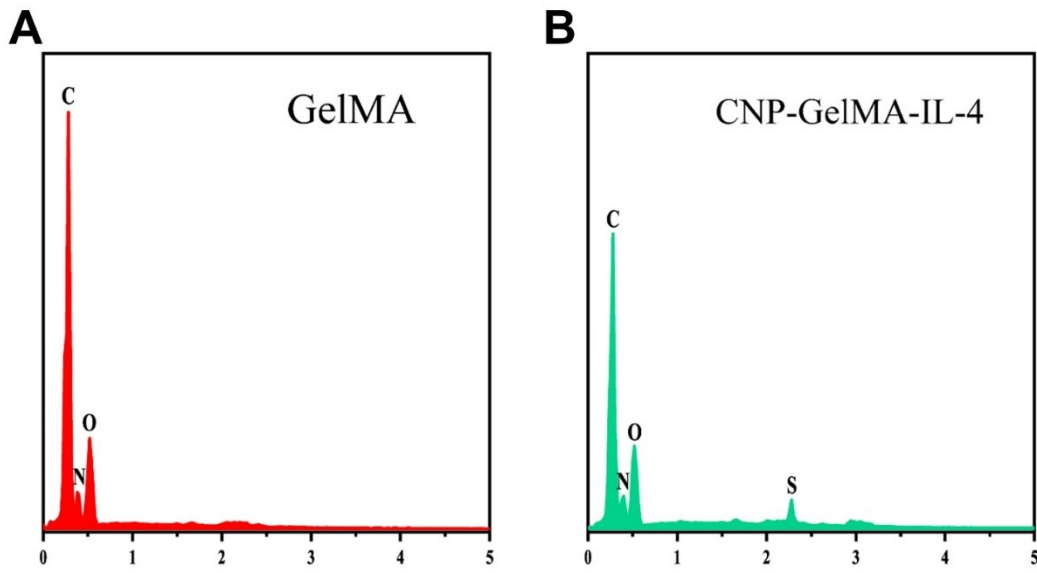

18

19 **Fig. S2. EDS analysis of empty carrier (A) GelMA and (B) CNP-GelMA-IL-4 synergistic dual-function**  
20 **microspheres.**

21

**A**

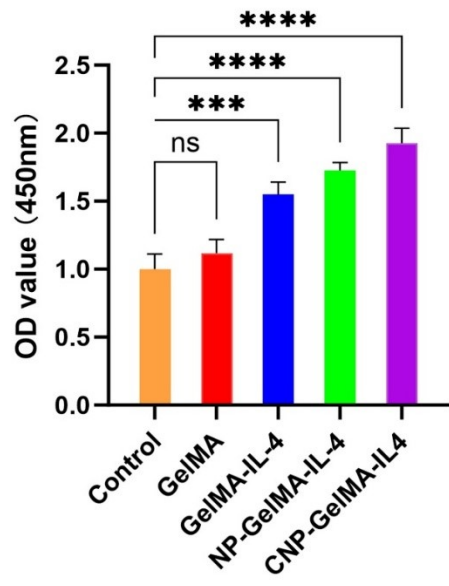

22

23 **Fig. S3. CCK-8 assay results for cell proliferation.**

24 .

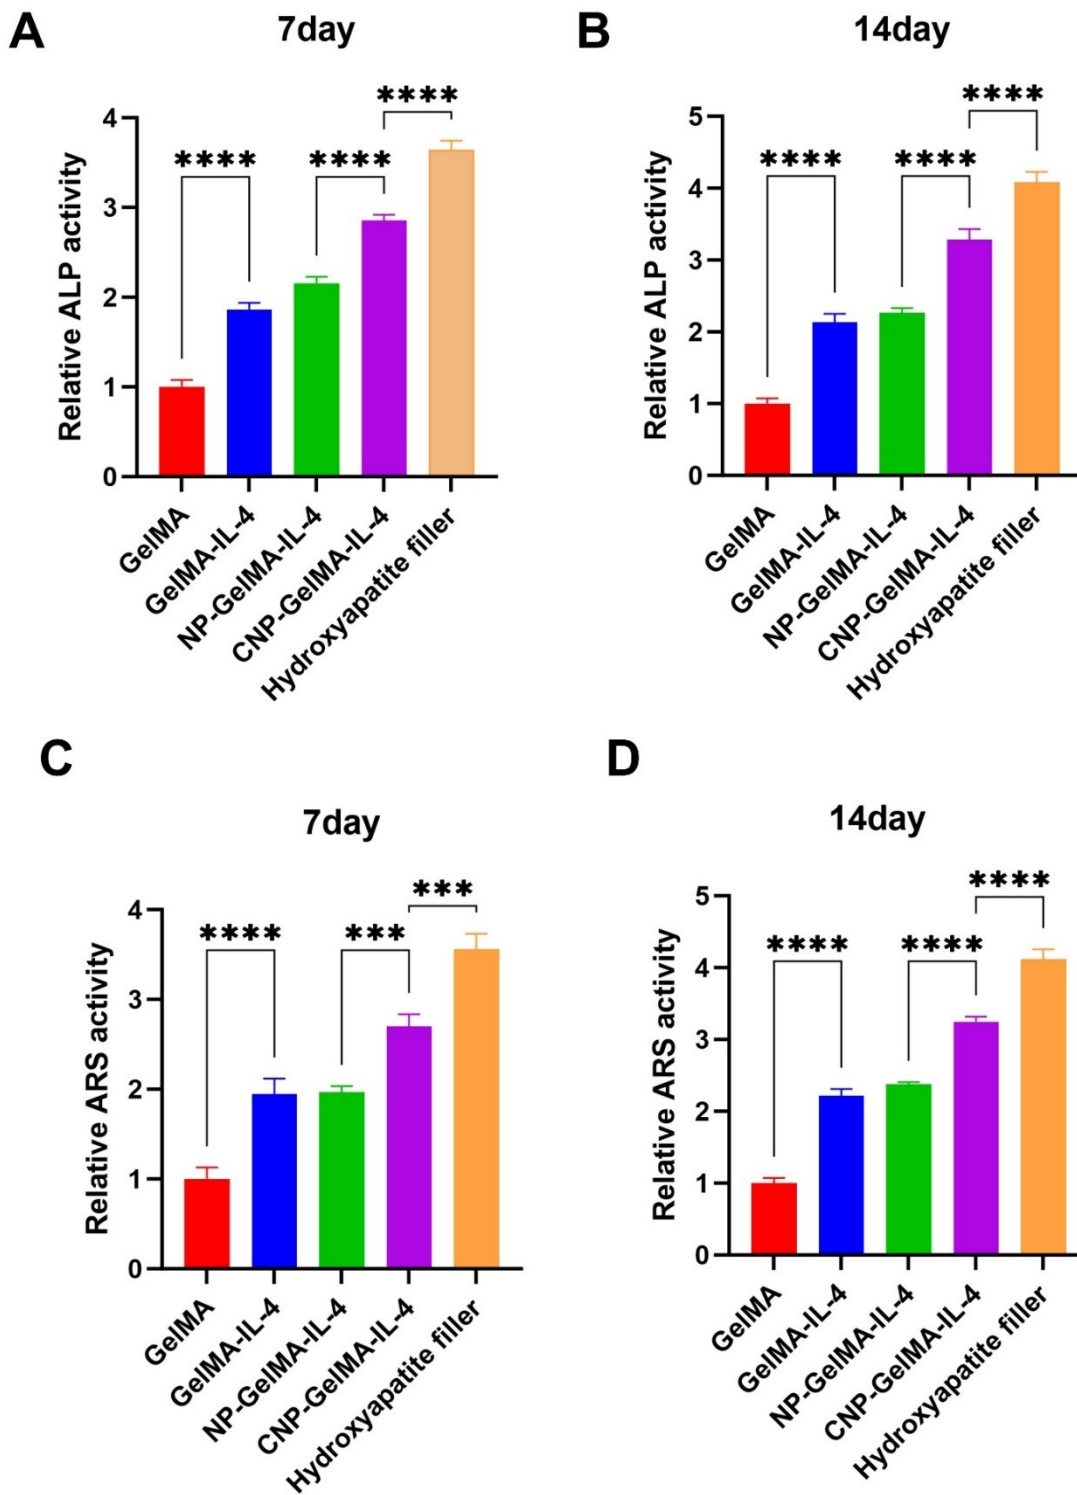

25

26 Fig. S4. Semi-quantitative analysis of ALP activity at day 7 (A) and day 14 (B); Semi-quantitative  
 27 analysis of calcium nodule formation assessed by ARS staining at day 7 (C) and day 14 (D).

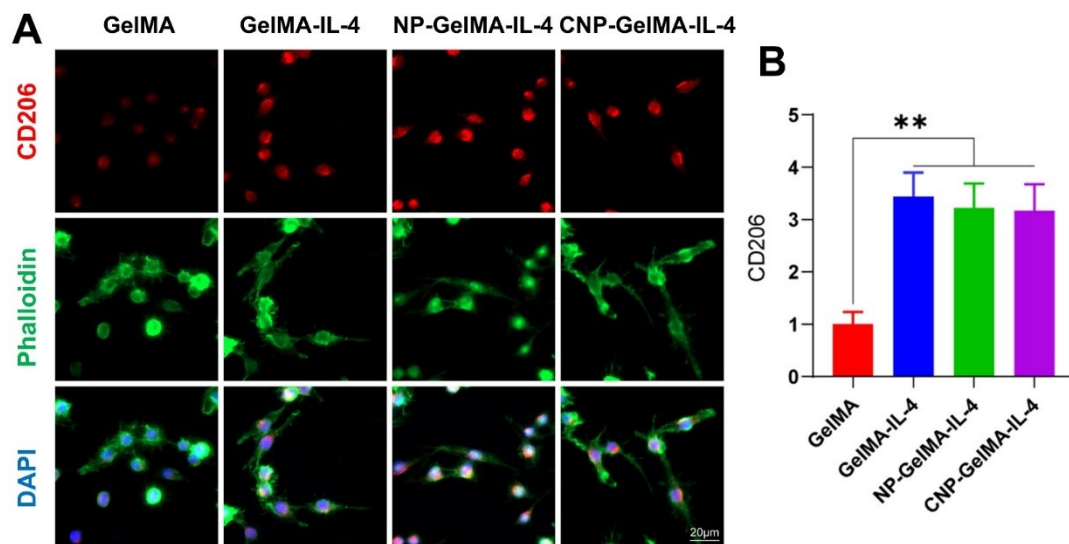

29

30 Fig.S5. (A) Macrophage CD206 Immunofluorescence Staining Image; (B) Macrophage CD206  
31 Immunofluorescence Semi-Quantitative Analysis.

A

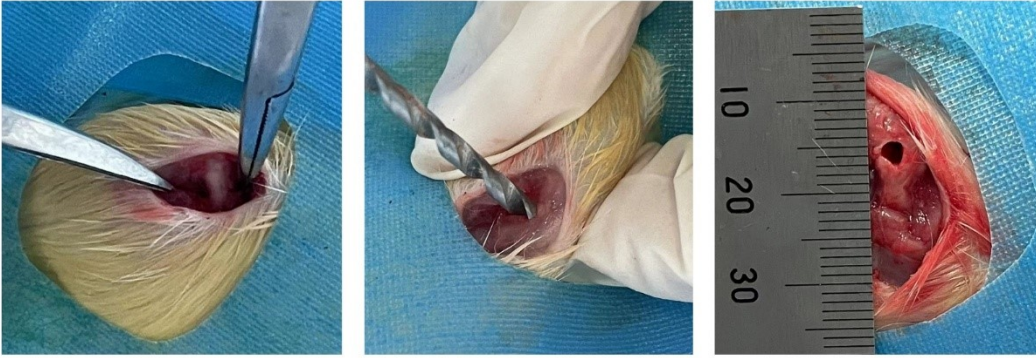

32

33 **Fig. S6. Schematic Diagram of the Establishment of a Femoral Condyle Defect Model**

34

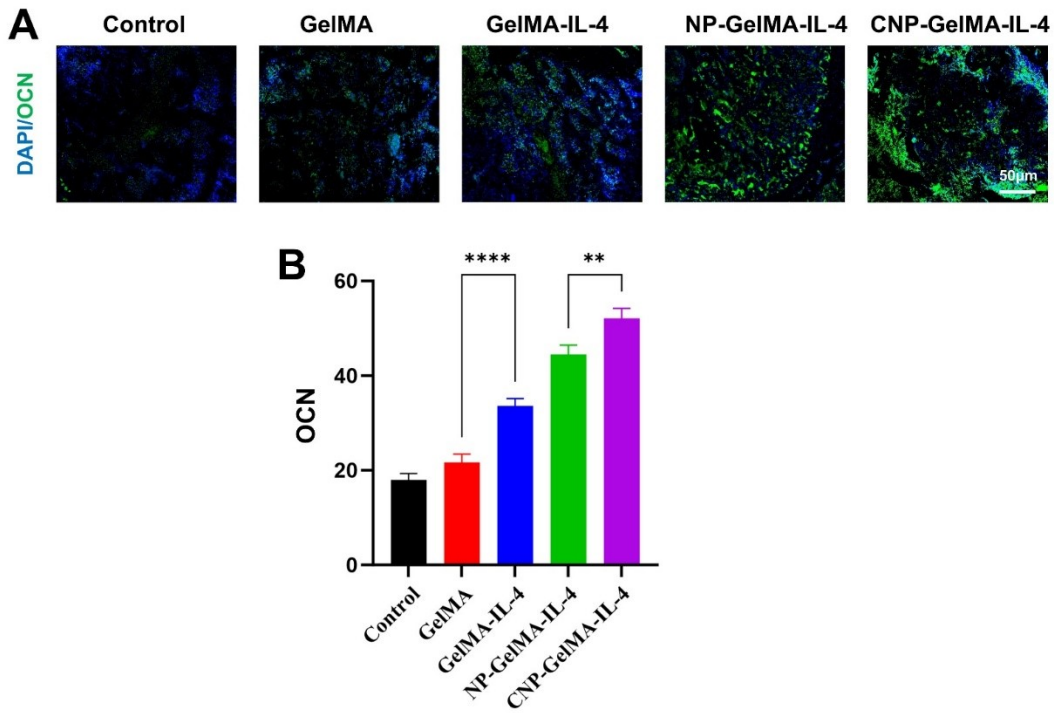

37 **Fig. S7. (A)**OCN Immunofluorescence findings in femoral condyle specimens from different groups;

38 **(B)** Semi-quantitative OCN Immunofluorescence findings in vivo.

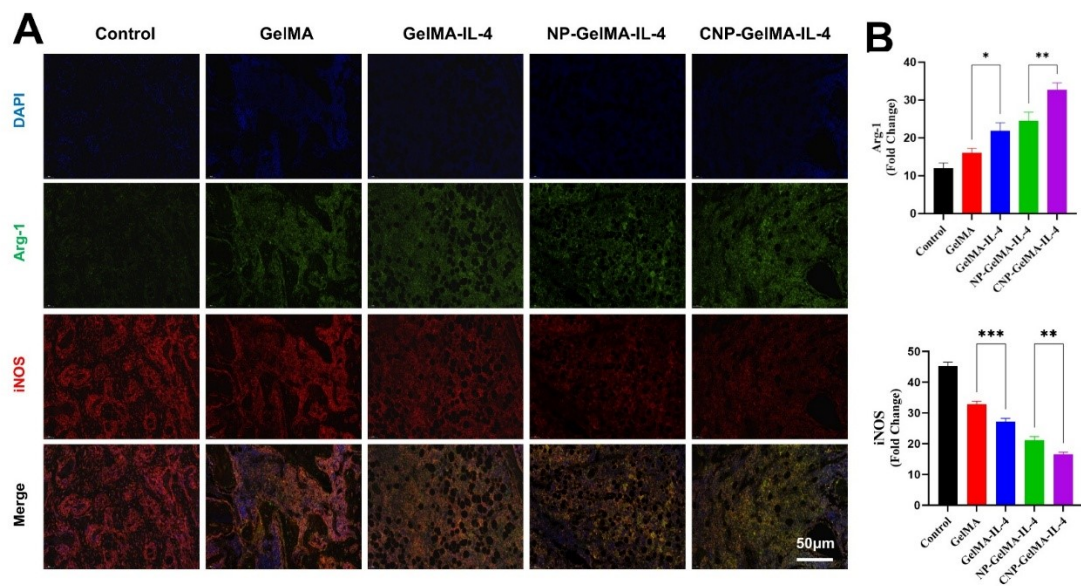

**Fig. S8. (A)** Polarised histochemical immunofluorescence staining results for Arg-1 and iNOS markers; **(B)** Semi-quantitative results of Arg-1 and iNOS immunofluorescence
